# Supplementary material for: Geosite Assessment in the Beigua UNESCO Global Geopark (Liguria, Italy): A Case Study in Linking Geoheritage with Education, Tourism, and Community Involvement
Source: MDPI journal article supplement (doi:10.3390/land11101667), 2022-09-27
Supplement: s1 [file s1]

**Table S1.** Quantitative assessment of selected geosites (G) and geodiversity sites (GD) from Beigua UGGp according to the criteria of Brilha (2016) [3]. G1) Peridotitic spheroids (Lago dei Gulli); G2) Fossil corals (Ponte Prina); G3) Val Gargassa canyon (Gargassino); G4) Blockfields (Pian del Fretto); G5) Eclogites and rodingites (Vara); GD6) Serpentinities (Pratorotondo); GD7) Orba meander (Tiglieto); GD8) Laione peat bog (Piampaludo); GD9) Garnet crystals (Faiallo); GD10) Serpentinities and metagabbros (Lungomare Europa). The description of the sites is reported in Tables 1 and 2.

|                                                        | G1        | G2        | G3        | G4        | G5        | GD6       | GD7       | GD8       | GD9       | GD10      |
|--------------------------------------------------------|-----------|-----------|-----------|-----------|-----------|-----------|-----------|-----------|-----------|-----------|
| <b>Scientific Value (SV)</b>                           |           |           |           |           |           |           |           |           |           |           |
| Representativeness                                     | 4         | 4         | 4         | 4         | 2         | 2         | 2         | 4         | 2         | 2         |
| Key locality                                           | 2         | 2         | 1         | 2         | 2         | 2         | 1         | 2         | 2         | 2         |
| Scientific knowledge                                   | 2         | 4         | 2         | 4         | 4         | 4         | 1         | 1         | 2         | 4         |
| Integrity                                              | 4         | 4         | 4         | 4         | 4         | 4         | 4         | 4         | 1         | 4         |
| Geological diversity                                   | 1         | 2         | 4         | 1         | 1         | 1         | 0         | 1         | 0         | 1         |
| Rarity                                                 | 4         | 4         | 4         | 1         | 1         | 0         | 2         | 2         | 1         | 1         |
| Use limitations                                        | 2         | 1         | 2         | 2         | 2         | 2         | 1         | 2         | 2         | 2         |
| <b>Total</b>                                           | <b>19</b> | <b>21</b> | <b>21</b> | <b>18</b> | <b>16</b> | <b>15</b> | <b>11</b> | <b>16</b> | <b>10</b> | <b>16</b> |
| <b>Potential Educational Use (PEU)</b>                 |           |           |           |           |           |           |           |           |           |           |
| Vulnerability                                          | 4         | 1         | 4         | 4         | 2         | 4         | 4         | 4         | 1         | 4         |
| Accessibility                                          | 3         | 4         | 1         | 1         | 4         | 1         | 4         | 4         | 2         | 4         |
| Use limitations                                        | 4         | 4         | 4         | 4         | 4         | 4         | 4         | 4         | 4         | 4         |
| Safety                                                 | 4         | 4         | 1         | 2         | 4         | 2         | 4         | 2         | 3         | 4         |
| Logistic                                               | 4         | 4         | 4         | 3         | 4         | 3         | 3         | 3         | 4         | 4         |
| Density of population                                  | 1         | 1         | 1         | 1         | 1         | 1         | 1         | 1         | 1         | 3         |
| Association with other values                          | 4         | 4         | 3         | 4         | 2         | 4         | 4         | 4         | 2         | 4         |
| Scenery                                                | 2         | 2         | 2         | 4         | 1         | 4         | 2         | 3         | 3         | 4         |
| Uniqueness                                             | 2         | 4         | 2         | 2         | 2         | 2         | 1         | 1         | 1         | 2         |
| Observation conditions                                 | 4         | 4         | 4         | 4         | 4         | 4         | 4         | 4         | 1         | 4         |
| Didactic potential                                     | 2         | 4         | 2         | 4         | 1         | 2         | 2         | 4         | 1         | 4         |
| Geological diversity                                   | 2         | 3         | 3         | 2         | 2         | 2         | 1         | 4         | 1         | 3         |
| <b>Total</b>                                           | <b>36</b> | <b>39</b> | <b>31</b> | <b>35</b> | <b>31</b> | <b>33</b> | <b>34</b> | <b>38</b> | <b>24</b> | <b>44</b> |
| <b>Potential Touristic Use (PEU)</b>                   |           |           |           |           |           |           |           |           |           |           |
| Vulnerability                                          | 4         | 1         | 4         | 4         | 2         | 4         | 4         | 4         | 1         | 4         |
| Accessibility                                          | 3         | 4         | 1         | 1         | 4         | 1         | 4         | 4         | 2         | 4         |
| Use limitations                                        | 4         | 4         | 4         | 4         | 4         | 4         | 4         | 4         | 4         | 4         |
| Safety                                                 | 4         | 4         | 1         | 2         | 4         | 2         | 4         | 2         | 3         | 4         |
| Logistic                                               | 4         | 4         | 4         | 3         | 4         | 3         | 3         | 3         | 4         | 4         |
| Density of population                                  | 1         | 1         | 1         | 1         | 1         | 1         | 1         | 1         | 1         | 3         |
| Association with other values                          | 4         | 4         | 3         | 4         | 2         | 4         | 4         | 4         | 2         | 4         |
| Scenery                                                | 2         | 2         | 2         | 4         | 1         | 4         | 2         | 3         | 3         | 4         |
| Uniqueness                                             | 2         | 4         | 2         | 2         | 2         | 2         | 1         | 1         | 1         | 2         |
| Observation conditions                                 | 4         | 4         | 4         | 4         | 4         | 4         | 4         | 4         | 1         | 4         |
| Interpretative potential                               | 3         | 4         | 4         | 4         | 3         | 4         | 3         | 4         | 2         | 4         |
| Economic level                                         | 1         | 1         | 1         | 1         | 1         | 1         | 1         | 1         | 1         | 3         |
| Proximity of recreational areas                        | 4         | 4         | 4         | 2         | 4         | 2         | 4         | 2         | 3         | 4         |
| <b>Total</b>                                           | <b>40</b> | <b>41</b> | <b>35</b> | <b>36</b> | <b>36</b> | <b>36</b> | <b>39</b> | <b>37</b> | <b>28</b> | <b>48</b> |
| <b>Degradation Risk (DR)</b>                           |           |           |           |           |           |           |           |           |           |           |
| Deterioration of geological elements                   | 1         | 4         | 1         | 1         | 1         | 1         | 1         | 2         | 4         | 1         |
| Proximity to areas with potential to cause degradation | 1         | 3         | 1         | 1         | 3         | 1         | 1         | 1         | 3         | 1         |
| Legal protection                                       | 1         | 1         | 1         | 2         | 1         | 2         | 1         | 1         | 1         | 1         |
| Accessibility                                          | 3         | 4         | 1         | 1         | 4         | 1         | 4         | 4         | 2         | 4         |
| Density of population                                  | 1         | 1         | 1         | 1         | 1         | 1         | 1         | 1         | 1         | 3         |
| <b>Total</b>                                           | <b>7</b>  | <b>13</b> | <b>5</b>  | <b>6</b>  | <b>10</b> | <b>6</b>  | <b>8</b>  | <b>9</b>  | <b>11</b> | <b>10</b> |

|                                                        | Weight                          | G1  | G2  | G3  | G4  | G5  | GD6 | GD7 | GD8 | GD9 | GD10 |
|--------------------------------------------------------|---------------------------------|-----|-----|-----|-----|-----|-----|-----|-----|-----|------|
|                                                        | Scientific Value (SV)           |     |     |     |     |     |     |     |     |     |      |
| Representativeness                                     | 30                              | 120 | 120 | 120 | 120 | 120 | 60  | 60  | 120 | 60  | 60   |
| Key locality                                           | 20                              | 40  | 40  | 20  | 40  | 40  | 40  | 20  | 40  | 40  | 40   |
| Scientific knowledge                                   | 5                               | 10  | 20  | 10  | 20  | 20  | 20  | 5   | 5   | 10  | 20   |
| Integrity                                              | 15                              | 60  | 60  | 60  | 60  | 60  | 60  | 60  | 60  | 15  | 60   |
| Geological diversity                                   | 5                               | 5   | 10  | 20  | 5   | 5   | 5   | 0   | 5   | 0   | 5    |
| Rarity                                                 | 15                              | 60  | 60  | 60  | 15  | 15  | 0   | 30  | 30  | 15  | 15   |
| Use limitations                                        | 10                              | 20  | 10  | 20  | 20  | 20  | 20  | 10  | 20  | 20  | 20   |
| Total                                                  | 100                             | 315 | 320 | 310 | 280 | 280 | 205 | 185 | 280 | 160 | 220  |
|                                                        | Potential Educational Use (PEU) |     |     |     |     |     |     |     |     |     |      |
| Vulnerability                                          | 10                              | 40  | 10  | 40  | 40  | 20  | 40  | 40  | 40  | 10  | 40   |
| Accessibility                                          | 10                              | 30  | 40  | 10  | 10  | 40  | 10  | 40  | 40  | 20  | 40   |
| Use limitations                                        | 5                               | 20  | 20  | 20  | 20  | 20  | 20  | 20  | 20  | 20  | 20   |
| Safety                                                 | 10                              | 40  | 40  | 10  | 20  | 40  | 20  | 40  | 20  | 30  | 40   |
| Logistic                                               | 5                               | 20  | 20  | 20  | 15  | 20  | 15  | 15  | 15  | 20  | 20   |
| Density of population                                  | 5                               | 5   | 5   | 5   | 5   | 5   | 5   | 5   | 5   | 5   | 15   |
| Association with other values                          | 5                               | 20  | 20  | 15  | 20  | 10  | 20  | 20  | 20  | 10  | 20   |
| Scenery                                                | 5                               | 10  | 10  | 10  | 20  | 5   | 20  | 10  | 15  | 15  | 20   |
| Uniqueness                                             | 5                               | 10  | 20  | 10  | 10  | 10  | 10  | 5   | 5   | 5   | 10   |
| Observation conditions                                 | 10                              | 40  | 40  | 40  | 40  | 40  | 40  | 40  | 40  | 10  | 40   |
| Didactic potential                                     | 20                              | 40  | 80  | 40  | 80  | 20  | 40  | 40  | 80  | 20  | 80   |
| Geological diversity                                   | 10                              | 20  | 30  | 30  | 20  | 20  | 20  | 10  | 40  | 10  | 30   |
| Total                                                  | 100                             | 295 | 335 | 250 | 300 | 250 | 260 | 285 | 340 | 175 | 375  |
|                                                        | Potential Touristic Use (PEU)   |     |     |     |     |     |     |     |     |     |      |
| Vulnerability                                          | 10                              | 40  | 10  | 40  | 40  | 20  | 40  | 40  | 40  | 10  | 40   |
| Accessibility                                          | 10                              | 30  | 40  | 10  | 10  | 40  | 10  | 40  | 40  | 20  | 40   |
| Use limitations                                        | 5                               | 20  | 20  | 20  | 20  | 20  | 20  | 20  | 20  | 20  | 20   |
| Safety                                                 | 10                              | 40  | 40  | 10  | 20  | 40  | 20  | 40  | 20  | 30  | 40   |
| Logistic                                               | 5                               | 20  | 20  | 20  | 15  | 20  | 15  | 15  | 15  | 20  | 20   |
| Density of population                                  | 5                               | 5   | 5   | 5   | 5   | 5   | 5   | 5   | 5   | 5   | 15   |
| Association with other values                          | 5                               | 20  | 20  | 15  | 20  | 10  | 20  | 20  | 20  | 10  | 20   |
| Scenery                                                | 15                              | 30  | 30  | 30  | 60  | 15  | 60  | 30  | 45  | 45  | 60   |
| Uniqueness                                             | 10                              | 20  | 40  | 20  | 20  | 20  | 20  | 10  | 10  | 10  | 20   |
| Observation conditions                                 | 5                               | 20  | 20  | 20  | 20  | 20  | 20  | 20  | 20  | 5   | 20   |
| Interpretative potential                               | 10                              | 30  | 40  | 40  | 40  | 30  | 40  | 30  | 40  | 20  | 40   |
| Economic level                                         | 5                               | 5   | 5   | 5   | 5   | 5   | 5   | 5   | 5   | 5   | 15   |
| Proximity of recreational areas                        | 5                               | 20  | 20  | 20  | 10  | 20  | 10  | 20  | 10  | 15  | 20   |
| Total                                                  | 100                             | 300 | 310 | 255 | 285 | 265 | 285 | 295 | 290 | 215 | 370  |
|                                                        | Degradation Risk (DR)           |     |     |     |     |     |     |     |     |     |      |
| Deteroration of geological elements                    | 35                              | 35  | 140 | 35  | 35  | 35  | 35  | 35  | 70  | 140 | 35   |
| Proximity to areas with potential to cause degradation | 20                              | 20  | 60  | 20  | 20  | 60  | 20  | 20  | 20  | 60  | 20   |
| Legal protection                                       | 20                              | 20  | 20  | 20  | 40  | 20  | 40  | 20  | 20  | 20  | 20   |
| Accessibility                                          | 15                              | 45  | 60  | 15  | 15  | 60  | 15  | 60  | 60  | 30  | 60   |
| Density of population                                  | 10                              | 10  | 10  | 10  | 10  | 10  | 10  | 10  | 10  | 10  | 30   |
| Total                                                  | 100                             | 130 | 290 | 100 | 120 | 185 | 120 | 145 | 180 | 260 | 165  |
| Class of degradation risk                              |                                 | L   | M   | L   | L   | L   | L   | L   | L   | M   | L    |
